# Supplementary material for: Temporal patterns in acoustic presence and foraging activity of oceanic dolphins at seamounts in the Azores
Source: PubMed Central journal article supplement (PMC7046721; doi:10.1038/s41598-020-60441-4), 2020-02-27
Supplement: 41598_2020_60441_MOESM1_ESM.pdf [file 41598_2020_60441_MOESM1_ESM.pdf]

# Supplementary information

## Temporal patterns in acoustic presence and foraging activity of oceanic dolphins at seamounts in the Azores

Irma Cascao<sup>1\*</sup>, Marc O. Lammers<sup>2,3</sup>, Rui Prieto<sup>1</sup>, Ricardo S. Santos<sup>1</sup>, Mónica A. Silva<sup>1,4</sup>

<sup>1</sup> Marine and Environmental Sciences Centre (MARE), Institute of Marine Research (IMAR) and Okeanos R&D Centre, University of the Azores, Rua Frederico Machado 4, 9901-862 Horta, Portugal

<sup>2</sup> Hawaiian Islands Humpback Whale National Marine Sanctuary, National Oceanic and Atmospheric Administration (NOAA), Kihei, HI 96753, USA

<sup>3</sup> Oceanwide Science Institute (OSI), PO Box 61692, Honolulu, HI 96744, USA

<sup>4</sup> Biology Department, Woods Hole Oceanographic Institution, Woods Hole, MA 02543, USA

\* Corresponding author (email: [irma.cascao@gmail.com](mailto:irma.cascao@gmail.com))

25 **Supplementary tables**

26

27 **Supplementary Table S1. Analysis of deviance (ANOVA) table for the best fitted GLM model**

28 **of dolphin positive hours (DPH) and of foraging positive hours (FPH).** Significant term ( $p < 0.05$ )

29 is shown in bold. S. period - sampling period, *df* - degrees of freedom, *Dev.* - deviance, *Res. df* -

30 residual *df*, *Res dev.* - residual deviance.

|           | <b>DPH</b> |             |                |                  |                   | <b>FPH</b> |             |                |                  |                |
|-----------|------------|-------------|----------------|------------------|-------------------|------------|-------------|----------------|------------------|----------------|
|           | <i>df</i>  | <i>Dev.</i> | <i>Res. df</i> | <i>Res. dev.</i> | <i>p-value</i>    | <i>df</i>  | <i>Dev.</i> | <i>Res. df</i> | <i>Res. dev.</i> | <i>p-value</i> |
| NULL      |            |             | 688            | 208.10           |                   |            |             | 682            | 35.80            |                |
| Seamount  | 1          | 0.001       | 687            | 208.10           | 0.976             | 1          | 2.129       | 681            | 33.67            | 0.145          |
| S. period | 13         | 60.509      | 674            | 147.59           | <b>&lt; 0.001</b> | 13         | 5.020       | 668            | 28.65            | 0.975          |

31

32 **Supplementary Table S2. Pairwise comparisons using Wilcoxon rank-sum test of dolphin positive hours (DPH) between pairs of sampling**  
 33 **periods at Condor seamount.** Significant terms ( $p < 0.05$ ) are shown in bold.

|         | Jan2011          | Feb2011          | Mar2008          | Apr2008          | Apr2010          | May2008          | May2010      | Jun2010 | Jul2010 | Aug2010 | Sep2010 | Oct2010          | Nov2010 |
|---------|------------------|------------------|------------------|------------------|------------------|------------------|--------------|---------|---------|---------|---------|------------------|---------|
| Feb2011 | 1.000            | -                | -                | -                | -                | -                | -            | -       | -       | -       | -       | -                | -       |
| Mar2008 | 1.000            | 1.000            | -                | -                | -                | -                | -            | -       | -       | -       | -       | -                | -       |
| Apr2008 | <b>0.001</b>     | <b>&lt;0.001</b> | <b>&lt;0.001</b> | -                | -                | -                | -            | -       | -       | -       | -       | -                | -       |
| Apr2010 | 1.000            | 1.000            | 1.000            | <b>&lt;0.001</b> | -                | -                | -            | -       | -       | -       | -       | -                | -       |
| May2008 | <b>&lt;0.001</b> | <b>&lt;0.001</b> | <b>&lt;0.001</b> | 1.000            | <b>&lt;0.001</b> | -                | -            | -       | -       | -       | -       | -                | -       |
| May2010 | 1.000            | <b>0.028</b>     | <b>0.022</b>     | 0.474            | 1.000            | <b>&lt;0.001</b> | -            | -       | -       | -       | -       | -                | -       |
| Jun2010 | <b>&lt;0.001</b> | <b>&lt;0.001</b> | <b>&lt;0.001</b> | 1.000            | <b>&lt;0.001</b> | <b>0.043</b>     | 0.749        | -       | -       | -       | -       | -                | -       |
| Jul2010 | <b>0.034</b>     | <b>&lt;0.001</b> | <b>&lt;0.001</b> | 1.000            | <b>0.008</b>     | <b>&lt;0.001</b> | 1.000        | 1.000   | -       | -       | -       | -                | -       |
| Aug2010 | <b>0.017</b>     | <b>&lt;0.001</b> | <b>&lt;0.001</b> | 1.000            | <b>0.003</b>     | <b>0.002</b>     | 1.000        | 1.000   | 1.000   | -       | -       | -                | -       |
| Sep2010 | 1.000            | <b>0.021</b>     | <b>0.008</b>     | 1.000            | 0.159            | <b>0.002</b>     | 1.000        | 1.000   | 1.000   | 1.000   | -       | -                | -       |
| Oct2010 | <b>&lt;0.001</b> | <b>&lt;0.001</b> | <b>&lt;0.001</b> | 1.000            | <b>&lt;0.001</b> | 1.000            | <b>0.007</b> | 1.000   | 0.102   | 0.400   | 0.052   | -                | -       |
| Nov2010 | 1.000            | <b>0.014</b>     | <b>0.006</b>     | 0.539            | 0.248            | <b>&lt;0.001</b> | 1.000        | 0.575   | 1.000   | 1.000   | 1.000   | <b>0.002</b>     | -       |
| Dec2010 | 1.000            | 0.050            | <b>0.015</b>     | 0.100            | 0.840            | <b>&lt;0.001</b> | 1.000        | 0.129   | 1.000   | 1.000   | 1.000   | <b>&lt;0.001</b> | 1.000   |

35 **Supplementary Table S3. Pairwise comparisons using Wilcoxon rank-sum test of dolphin positive hours (DPH) between pairs of sampling**  
 36 **periods at Gigante seamount.** Significant terms ( $p < 0.05$ ) are shown in bold.

|         | Jan2011          | Feb2011      | Mar2008      | Apr2008      | May2008          | Jul2010 | Aug2010      | Sep2010      | Oct2010      | Nov2010 |
|---------|------------------|--------------|--------------|--------------|------------------|---------|--------------|--------------|--------------|---------|
| Feb2011 | 1.000            | -            | -            | -            | -                | -       | -            | -            | -            | -       |
| Mar2008 | <b>0.036</b>     | 0.129        | -            | -            | -                | -       | -            | -            | -            | -       |
| Apr2008 | <b>0.024</b>     | 0.096        | 1.000        | -            | -                | -       | -            | -            | -            | -       |
| May2008 | <b>&lt;0.001</b> | <b>0.001</b> | 1.000        | 1.000        | -                | -       | -            | -            | -            | -       |
| Jul2010 | 1.000            | 1.000        | 0.592        | 1.000        | <b>0.003</b>     | -       | -            | -            | -            | -       |
| Aug2010 | <b>0.022</b>     | 0.058        | 1.000        | 1.000        | 0.287            | 1.000   | -            | -            | -            | -       |
| Sep2010 | <b>0.012</b>     | 0.102        | 1.000        | 1.000        | 1.000            | 1.000   | 1.000        | -            | -            | -       |
| Oct2010 | <b>0.001</b>     | <b>0.009</b> | 1.000        | 1.000        | 1.000            | 0.111   | 1.000        | 1.000        | -            | -       |
| Nov2010 | 1.000            | 1.000        | 0.094        | 0.415        | <b>&lt;0.001</b> | 1.000   | 0.381        | 0.082        | <b>0.015</b> | -       |
| Dec2010 | 1.000            | 1.000        | <b>0.020</b> | <b>0.048</b> | <b>&lt;0.001</b> | 1.000   | <b>0.003</b> | <b>0.004</b> | <b>0.002</b> | 1.000   |

37

38 **Supplementary Table S4. ANOVA table for the best fitted GAMM model of diel patterns in**  
 39 **dolphin detections and acoustic signals.** Significant terms ( $p < 0.05$ ) are shown in bold. H after SS –  
 40 hours after sunset.

| <b>Models</b>       | <b>Smooth terms</b>              | <i>edf</i> | <i>F</i> | <i>p-value</i> |
|---------------------|----------------------------------|------------|----------|----------------|
| Dolphin detections  | s(H after SS) <sub>Jan-Mar</sub> | 1.000      | 35.70    | < <b>0.001</b> |
| (n = 16,421)        | s(H after SS) <sub>Apr-Dec</sub> | 7.114      | 69.91    | < <b>0.001</b> |
| Foraging signals    | s(H after SS)                    | 3.646      | 16.92    | < <b>0.001</b> |
| (n = 7,966)         |                                  |            |          |                |
| Echolocation clicks | s(H after SS)                    | 6.226      | 24.44    | < <b>0.001</b> |
| (n = 7,966)         |                                  |            |          |                |
| Social signals      | s(H after SS)                    | 6.527      | 14.10    | < <b>0.001</b> |
| (n = 7,966)         |                                  |            |          |                |

41
